# Supplementary material for: Laponite and hybrid surfactant/laponite particles processed as spheres by spray-drying
Source: Royal Society of Chemistry journal article supplement (doi:10.1039/b820429b), 2009-01-01
Supplement: b820429b.pdf [file b820429b.pdf]

### Supplementary materials:

Figure SM1: thermogravimetric curves of surfactant-free materials (1) : (a) RL ; (b) 473 K – DL ; (c) SDL and Brij58/laponites materials (2): (a) SDL, (b)SDL/B-2, (c) SDL/B-4, (d) SDL/B-6, (e) SDL/B-8 and (f) physical blend of Brij58 and Quartz

Figure SM2: FTIR spectra of (a) RL, (b) SDL, (c) SDL/B-4 samples

Figure SM3 :  $^{29}\text{Si}$  MAS-DEC NMR spectra of (a) RL and (b) SDL samples.

Figure SM4 :  $^1\text{H}$  MAS-NMR spectra of dehydrated (a) RL and (b) SDL samples

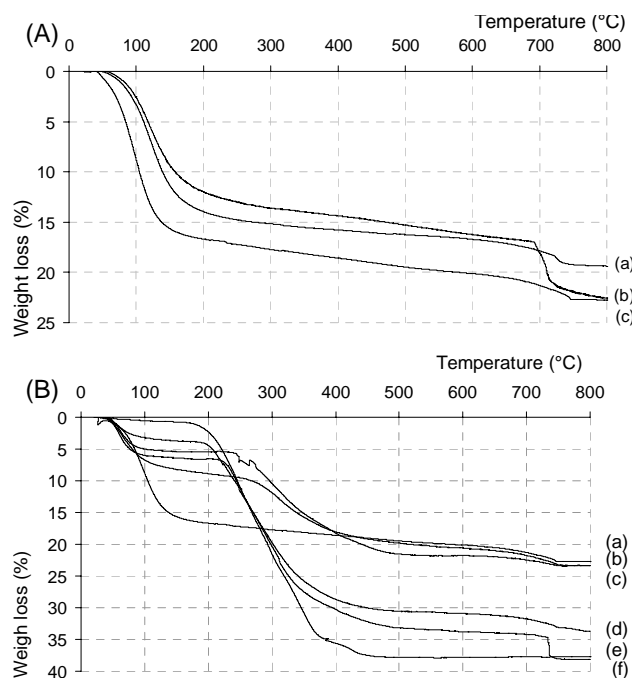

Figure SM1: thermogravimetric curves of surfactant-free materials (1) : (a) RL ; (b) 473 K – DL ; (c) SDL and Brij58/laponites materials (2): (a) SDL, (b)SDL/B-2, (c) SDL/B-4, (d) SDL/B-6, (e) SDL/B-8 and (f) physical blend of Brij58 and Quartz

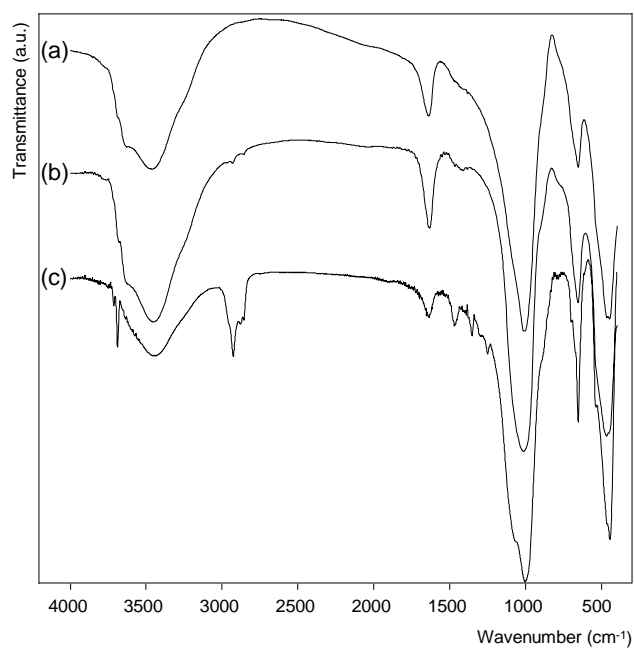

Figure SM2: FTIR spectra of (a) RL, (b) SDL,

(c) SDL/B-4 samples

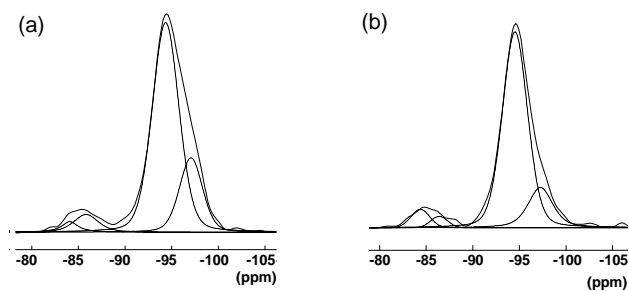

Figure SM3:  $^{29}\text{Si}$  MAS-DEC NMR spectra of (a) RL and (b) SDL samples.

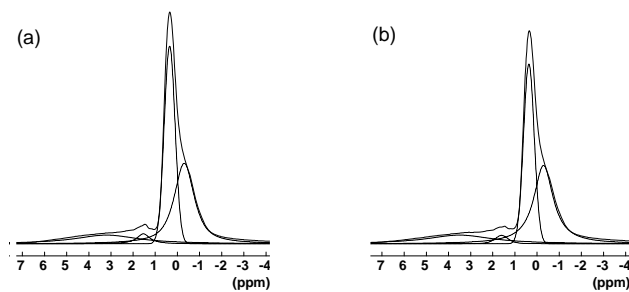

Figure SM4 :  $^1\text{H}$  MAS-NMR spectra of dehydrated (a) RL and (b) SDL samples
